# Supplementary material for: Effect of pillow height on the biomechanics of the head-neck complex: investigation of the cranio-cervical pressure and cervical spine alignment
Source: PubMed Central journal article supplement (PMC5012320; doi:10.7717/peerj.2397), 2016-08-31
Supplement: peerj-04-2397-s001.pdf [file peerj-04-2397-s001.pdf]

|            | Gender | Height (cm) | Weight (kg) | Neck Length (cm) |
|------------|--------|-------------|-------------|------------------|
| Subject 1  | M      | 184         | 56          | 15.52            |
| Subject 2  | M      | 173         | 61          | 14.28            |
| Subject 3  | M      | 180         | 70          | 14.52            |
| Subject 4  | M      | 180         | 68.5        | 14.51            |
| Subject 5  | M      | 175         | 85          | 12.1             |
| Subject 6  | F      | 156         | 50          | 11.56            |
| Subject 7  | F      | 158         | 51          | 11.49            |
| Subject 8  | F      | 160         | 48          | 12.15            |
| Subject 9  | F      | 158         | 49          | 12.45            |
| Subject 10 | F      | 163         | 54          | 13               |

|            | Cranial Region         |      |      |      |                     |       |       |       |
|------------|------------------------|------|------|------|---------------------|-------|-------|-------|
|            | Average Pressure (kPa) |      |      |      | Peak Pressure (kPa) |       |       |       |
|            | H0                     | H1   | H2   | H3   | H0                  | H1    | H2    | H3    |
| Subject 1  | 5.56                   | 5.24 | 4.14 | 4.37 | 15.53               | 13.21 | 10.42 | 10.67 |
| Subject 2  | 3.46                   | 4.13 | 3.91 | 6.3  | 7.87                | 12.18 | 8.81  | 15.23 |
| Subject 3  | 4.14                   | 4.47 | 5.47 | 5.65 | 10.97               | 11.66 | 11.42 | 15.74 |
| Subject 4  | 5.32                   | 4.6  | 3.98 | 5.58 | 18.08               | 9.49  | 11.06 | 22.31 |
| Subject 5  | 3.02                   | 2.91 | 3.37 | 6.15 | 6.32                | 6.27  | 10.51 | 15.58 |
| Subject 6  | 3.52                   | 4.6  | 5.73 | 6.62 | 8.31                | 14.47 | 15.38 | 21.35 |
| Subject 7  | 4                      | 3.36 | 4.58 | 5.69 | 11.38               | 8.07  | 13.63 | 15.92 |
| Subject 8  | 4.87                   | 4.67 | 6.21 | 7.06 | 13.87               | 14.23 | 14.67 | 16.32 |
| Subject 9  | 3.13                   | 4.71 | 5.28 | 5.45 | 11.33               | 10.32 | 11.88 | 9.26  |
| Subject 10 | 4.91                   | 6.46 | 6.13 | 6.38 | 14.22               | 18.23 | 14.64 | 17.89 |

|            | Cervical Region        |      |      |      |                     |       |       |       |
|------------|------------------------|------|------|------|---------------------|-------|-------|-------|
|            | Average Pressure (kPa) |      |      |      | Peak Pressure (kPa) |       |       |       |
|            | H0                     | H1   | H2   | H3   | H0                  | H1    | H2    | H3    |
| Subject 1  | 4.86                   | 5.18 | 6.36 | 5.72 | 11.9                | 11.48 | 13.94 | 14.48 |
| Subject 2  | 4.56                   | 6.51 | 6.99 | 8.18 | 8.4                 | 15.16 | 13.5  | 26.66 |
| Subject 3  | 3.52                   | 4.36 | 6.5  | 6.32 | 8.59                | 14.65 | 18.94 | 21.08 |
| Subject 4  | 3.51                   | 4.33 | 4.71 | 4.47 | 10.37               | 10.47 | 10.27 | 14.74 |
| Subject 5  | 4.33                   | 4.67 | 5.48 | 7.03 | 8.05                | 8.99  | 12.56 | 22.85 |
| Subject 6  | 3.78                   | 6.91 | 9.07 | 6.78 | 11.18               | 17.5  | 16.66 | 23    |
| Subject 7  | 3.9                    | 7.18 | 5.96 | 6.83 | 19.55               | 20.51 | 20.83 | 25.56 |
| Subject 8  | 4.09                   | 4.2  | 7.32 | 4.91 | 11.56               | 11.29 | 18.59 | 11.51 |
| Subject 9  | 4.18                   | 5.21 | 6.79 | 7.53 | 9.8                 | 14.32 | 20.63 | 26.66 |
| Subject 10 | 3.32                   | 5.34 | 6.78 | 6.3  | 6.41                | 22.93 | 22.09 | 17.85 |
