# Supplementary material for: Effect of pillow height on the biomechanics of the head-neck complex: investigation of the cranio-cervical pressure and cervical spine alignment
Source: PubMed Central journal article supplement (PMC5012320; doi:10.7717/peerj.2397), 2016-08-31
Supplement: peerj-04-2397-s002.pdf [file peerj-04-2397-s002.pdf]

Figure 6

## Cranial Height (cm)

|                              | H0       | H1       | H2       | H3       |
|------------------------------|----------|----------|----------|----------|
| Subject 1                    | 14.6175  | 11.73    | 19.5975  | 19.8075  |
| Subject 2                    | 15.09    | 25.5975  | 29.7975  | 31.8225  |
| Subject 3                    | 18.1875  | 23.52    | 26.67    | 30       |
| Subject 4                    | 19.56    | 22.8825  | 26.73    | 31.35    |
| Subject 5                    | 25.065   | 25.9425  | 28.785   | 29.1675  |
| Subject 6                    | 21.21    | 23.6325  | 25.9125  | 25.83    |
| Subject 7                    | 17.4975  | 21.9975  | 24.165   | 27.975   |
| Subject 8                    | 19.1175  | 23.0925  | 24.675   | 28.3725  |
| Subject 9                    | 20.3325  | 23.595   | 27.3375  | 27.5475  |
| Subject 10                   | 18.8925  | 22.5     | 24.6975  | 26.9625  |
| Mean:                        | 18.957   | 22.449   | 25.83675 | 27.8835  |
| Standard<br>Deviation:       | 3.003265 | 3.967704 | 2.83824  | 3.404374 |
| Finite Element<br>Prediction | 21.28    | 21.59    | 22       | 22.43    |
